# Supplementary material
Source: publisher site journal article supplement (https://www.dovepress.com/article/444751)
Supplement: Supplementary file 1 [file get_supplementary_file.php]

**Supplementary informations**





**Figure S1：**Mg ions release profile of 2%MgNPs and 6%MgNPs in vitro. Results are presented as mean ± SD (N = 3).


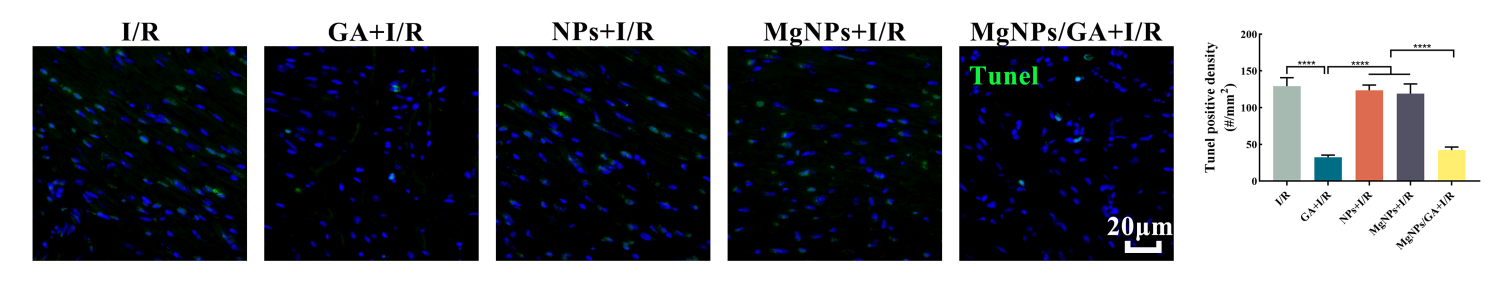


**Figure S2:** TUNEL staining of the histopathological sections of each group. Results are presented as mean ± SD (N = 6). ****P < 0.001.


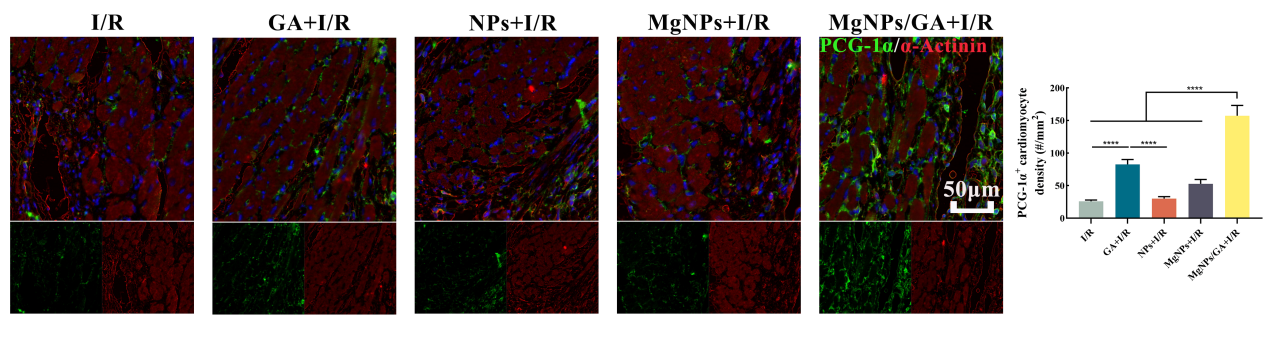


**Figure S3:** PCG-1α/α-Actinin immunofluorescent staining of the histopathological sections of each group. Results are presented as mean ± SD (N = 6). ****P < 0.001.


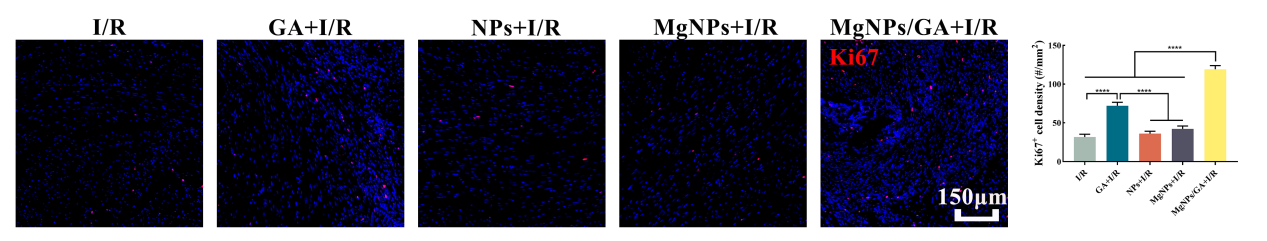


**Figure S4:** Ki67 immunofluorescent staining of the histopathological sections of each group. Results are presented as mean ± SD (N = 6). ****P < 0.001.
